# Supplementary material
Source: ML conference proceedings conference paper supplement (https://openreview.net/forum?id=EAdJEN8xKUl)
Supplement: supplementary_material [file attachment]

## A Supplementary Material

This supplemental material introduces implementation details, additional comparison experiments, complete proofs and checklist of our proposed model.

### A.1 Implementation Details

**Network Architecture:** Inspired by [33], we utilize a pre-trained ResNet-50 [20] as the feature extractor for object recognition tasks (*i.e.*, Office-31 [22], Office-Caltech [18] and Office-Home [46]). The penultimate fully-connected layer is replaced with a bottleneck layer and a classifier with weight normalization. Batch normalization is employed to normalize the outputs of bottleneck layer. For digit recognition task (*i.e.*, Digits-Five [41]), we utilize a variant of the LeNet [27] as the feature extractor and classifier.

**Training Settings:** Similar to [33], the pre-trained source models are optimized with smooth labels rather than the one-hot encoded labels. It improves the robustness of the trained model by encouraging semantic features to be clustered tightly. For the digit recognition task, the samples from each domain are resized to  $32 \times 32$ , and we convert the gray samples to RGB format. The overall framework is trained under an end-to-end manner via back-propagation. The stochastic gradient descent with momentum value as 0.9 is employed as the network optimizer. The initial learning rates for feature extractor and bottleneck layer are respectively set as  $10^{-3}$  and  $10^{-2}$ , while the parameters of classifier are frozen. It is exponentially decayed as the training process. We empirically set the batch size as 64, and set hyper-parameters  $\kappa_1$  and  $\kappa_2$  as 0.7 and  $10^{-2}$ . For multi-source-free domain adaptation task, the maximum number of training epoches is set to 15, where the pseudo label generation process occurs at the start of every epoch. All comparison experiments are conducted using Titan XP GPUs with 12 GB memory. For a fair comparison, our proposed model and comparison methods share the same random seed to run the experiments.

Table 4: Comparisons between our model and other competing methods on DomainNet [41] dataset, where R denotes the rest of five domains except for the single target domain.

| Methods                 | Source Data | R → Cl      | R → In      | R → Pa      | R → Qu      | R → Re      | R → Sk      | Avg.        |
|-------------------------|-------------|-------------|-------------|-------------|-------------|-------------|-------------|-------------|
| Source only [27]        | ✓           | 47.6        | 13.0        | 38.1        | 13.3        | 51.9        | 33.7        | 32.9        |
| MDAN [60]               | ✓           | 52.4        | 21.3        | 46.9        | 8.6         | 54.9        | 46.5        | 38.4        |
| DCTN [55]               | ✓           | 48.6        | 23.5        | 48.8        | 7.2         | 53.5        | 47.3        | 38.2        |
| M <sup>3</sup> SDA [41] | ✓           | 58.6        | <b>26.0</b> | 52.3        | 6.3         | 62.7        | 49.5        | 42.6        |
| MDDA [62]               | ✓           | 59.4        | 23.8        | 53.2        | 12.5        | 61.8        | 48.6        | 43.2        |
| LiC-MSDA [47]           | ✓           | 63.1        | 28.7        | <b>56.1</b> | 16.3        | 66.1        | <b>53.8</b> | 47.4        |
| Source model only       | ✓           | 49.3        | 14.2        | 39.4        | 12.6        | 53.0        | 35.1        | 33.9        |
| BAIT [57]               | ✗           | 57.5        | 22.8        | 54.1        | 14.7        | 64.6        | 49.2        | 43.8        |
| PrDA [25]               | ✗           | 57.2        | 23.6        | 55.1        | 16.4        | 65.5        | 47.3        | 44.2        |
| SHOT [33]               | ✗           | 58.6        | 25.2        | 55.3        | 15.3        | 70.5        | 52.4        | 46.2        |
| MA [30]                 | ✗           | 56.8        | 24.3        | 53.5        | 15.7        | 66.3        | 48.1        | 44.1        |
| DECISION [1]            | ✗           | 61.5        | 21.6        | 54.6        | 18.9        | 67.5        | 51.0        | 45.9        |
| Ours-w/oEnt             | ✗           | 60.9        | 18.7        | 52.6        | 18.6        | 67.7        | 49.4        | 44.7        |
| Ours-w/oDiv             | ✗           | 61.5        | 19.2        | 53.1        | 17.6        | 68.4        | 50.6        | 45.1        |
| Ours-w/oCls             | ✗           | 60.4        | 18.3        | 52.8        | 16.9        | 67.3        | 50.3        | 44.3        |
| Ours-w/oCrc             | ✗           | 62.8        | 21.1        | 53.5        | 18.4        | 70.8        | 51.2        | 46.3        |
| Ours                    | ✗           | <b>63.6</b> | 20.7        | 54.3        | <b>19.3</b> | <b>71.2</b> | 51.6        | <b>46.8</b> |

### A.2 Experiments on DomainNet Dataset

DomainNet [41] is by far the largest and most challenging multi-source domain adaptation dataset. It is composed of around 0.6 million samples and six different domains including Quickdraw (Qu), Clipart (Cl), Painting (Pa), Infograph (In), Sketch (Sk) and Real (Re). Each domain consists of the shared 345 different categories of common objects. There is large distribution discrepancy between any two different domains.

Table 4 reports the comparison experiments and ablation studies of our proposed model on DomainNet [41] dataset. From the introduced performance in Table 4, we could notice that: 1) Our proposed model performs better than prior state-of-the-art comparison methods, when there is no direct access to source data. The source-specific transferable perception strategy effectively quantifies the contributions of each source domain to facilitate the target adaptation performance. 2) The performance of

Table 5: Qualitative analysis about confident anchor group on several benchmark datasets.

| Avg.       | Office-31 [22] | Office-Caltech [18] | Office-Home [46] | Digits-Five [41] |
|------------|----------------|---------------------|------------------|------------------|
| Ours-w/oCp | 90.5           | 96.9                | 75.1             | 93.7             |
| Ours-w/oCd | 90.3           | 97.2                | 75.3             | 93.3             |
| Ours       | <b>91.6</b>    | <b>98.4</b>         | <b>76.2</b>      | <b>94.6</b>      |

our model degrades 0.5%~2.5% mean accuracy after removing one of designed components. The ablation studies also illustrate that all components in our proposed CAiDA model play an essential role in narrowing distribution discrepancy across domains for multi-source-free domain adaptation task. 3) The confident-anchor-induced pseudo label generator could mine confident pseudo labels for target data by incorporating with the source-specific transferable perception. It can be effectively illustrated via the degradation performance of Ours-w/oCIs and the comparison performance with some representative multi-source domain adaptation methods [41, 47, 55, 60, 62].

### A.3 Qualitative Analysis about Confident Anchor Group

This subsection investigates the effectiveness of our proposed confident anchor group to promote pseudo label generation process, as shown in Table 5. We denote our proposed model without using  $\mathcal{C}_p$  and  $\mathcal{C}_d$  as Ours-w/oCp and Ours-w/oCd, respectively. When compared with Ours, the performances of Ours-w/oCp and Ours-w/oCd degrade about 0.9%~1.5%. Such significant performance degradation validates the effectiveness of our proposed CAiDA model to eliminate the noisy pseudo label generation by performing the intersection operation between  $\mathcal{C}_p$  and  $\mathcal{C}_d$ .

### A.4 Proof for Theorem 1.

**Step 1.** According to the condition of Assumption 3 and  $\tau > 1 - B/K$ , we have that for  $\tau$ -anchor point  $\mathbf{x}$ ,

$$\max_{i \in [n]} \max_{k \in [K]} h_k^i(\mathbf{x}) > 1 - B/K \geq 1 - \min_{i \in [n]} \min_{l \in [K]} a_{li}^i(\mathbf{x})/K.$$

**Step 2.** We assume that  $h_r^j(\mathbf{x})$  attains the largest value of  $h_k^i(\mathbf{x})$  for any  $i \in [n], k \in [K]$ . Then

$$h_r^j(\mathbf{x}) > 1 - \min_{l \in [K]} a_{lr}^j(\mathbf{x})/K,$$

which implies that for  $k \in [K]$  and  $k \neq r$ ,

$$h_k^j(\mathbf{x}) \leq 1 - h_r^j(\mathbf{x}) < \min_{l \in [K]} a_{lr}^j(\mathbf{x})/K \leq a_{kk}^j(\mathbf{x})/K.$$

**Step 3.** First, we note that

$$P_{Y|X}(k|\mathbf{x}) \geq \frac{1}{K} \implies h_k^j(\mathbf{x}) \geq \frac{a_{kk}^j(\mathbf{x})}{K}.$$

Hence, if we assume the Bayesian label is true label, then for  $k \in [K]$  and  $k \neq r$ ,

$$h_k^j(\mathbf{x}) < \frac{a_{kk}^j(\mathbf{x})}{K} \implies \mathbf{x} \text{ has label } r.$$

Combining **Step 2** with **Step 3**, we complete the proof.

### A.5 Proof for Theorem 2.

**Step 1.** We claim that if  $d_{\text{TV}}(P_{XY}, Q_{XY}) < \sigma$ , then  $d_{\text{TV}}(P_X, Q_X) < \sigma$ .

Given any  $g : \mathcal{X} \rightarrow \mathbb{R}$  with  $|g| \leq 1$ . We set  $f(\mathbf{x}, y) = g(\mathbf{x})$ , for any  $(\mathbf{x}, y) \in \mathcal{X} \times \mathcal{Y}$ , then it is easy to check that

$$\left| \int f dP_{XY} - \int f dQ_{XY} \right| = \left| \int g dP_X - \int g dQ_X \right|.$$

Hence,  $d_{\text{TV}}(P_X, Q_X) \leq d_{\text{TV}}(P_{XY}, Q_{XY}) < \sigma$ .

**Step 2.** We claim that if  $d_{\text{TV}}(P_{XY}^t, P_{XY}^j) < \sigma$ , then

$$\int \|\Phi(y_1) - \Phi(y_2)\|_{\ell^1} dP_{Y|X}^t(y_1|\mathbf{x}) dP_{Y|X}^j(y_2|\mathbf{x}) dP_X^t(\mathbf{x}) < \sigma.$$

First, given any  $g : \mathcal{X} \times \mathcal{Y} \rightarrow \mathbb{R}$  with  $|g| \leq 1$ , then

$$\begin{aligned} \left| \int g dP_{XY}^t - \int g dP_{XY}^j \right| &= \left| \int g dP_{Y|X}^t dP_X^t - \int g dP_{Y|X}^j dP_X^j \right| \\ &\geq \left| \int g dP_{Y|X}^t dP_X^t - \int g dP_{Y|X}^j dP_X^t \right| \\ &\quad - \left| \int g dP_{Y|X}^j dP_X^t - \int g dP_{Y|X}^j dP_X^j \right| \\ &\geq \left| \int g dP_{Y|X}^t dP_X^t - \int g dP_{Y|X}^j dP_X^t \right| - \sigma. \end{aligned}$$

Now we set  $g(\mathbf{x}, y) = \text{sgn}(P_{Y|X}^t(y|\mathbf{x}) - P_{Y|X}^j(y|\mathbf{x}))$ , then

$$\begin{aligned} \sigma + \left| \int g dP_{XY}^t - \int g dP_{XY}^j \right| &\geq \int |P_{Y|X}^t - P_{Y|X}^j| dP_X^t \\ &\geq 2 \int \|\Phi(y_1) - \Phi(y_2)\|_{\ell^1} dP_{Y|X}^t(y_1|\mathbf{x}) dP_{Y|X}^j(y_2|\mathbf{x}) dP_X^t(\mathbf{x}). \end{aligned}$$

Above inequality has used  $P_{Y|X}^t = 1$  or 0. Hence,

$$\int \|\Phi(y_1) - \Phi(y_2)\|_{\ell^1} dP_{Y|X}^t(y_1|\mathbf{x}) dP_{Y|X}^j(y_2|\mathbf{x}) dP_X^t(\mathbf{x}) < \sigma.$$

**Step 3.** We claim that that if  $d_{\text{TV}}(P_{XY}^t, P_{XY}^j) < \sigma$ , then

$$\int \left| \|\Phi(y_1) - \mathbf{h}^j(\mathbf{x})\|_{\ell^1} - \|\Phi(y_2) - \mathbf{h}^j(\mathbf{x})\|_{\ell^1} \right| dP_{Y|X}^t(y_1|\mathbf{x}) dP_{Y|X}^j(y_2|\mathbf{x}) dP_X^t(\mathbf{x}) < \sigma.$$

That is because

$$\begin{aligned} &\int \left| \|\Phi(y_1) - \mathbf{h}^j(\mathbf{x})\|_{\ell^1} - \|\Phi(y_2) - \mathbf{h}^j(\mathbf{x})\|_{\ell^1} \right| dP_{Y|X}^t(y_1|\mathbf{x}) dP_{Y|X}^j(y_2|\mathbf{x}) dP_X^t(\mathbf{x}) \\ &\leq \int \|\Phi(y_1) - \Phi(y_2)\|_{\ell^1} dP_{Y|X}^t(y_1|\mathbf{x}) dP_{Y|X}^j(y_2|\mathbf{x}) dP_X^t(\mathbf{x}) < \sigma. \end{aligned}$$

**Step 4.** We claim that if  $d_{\text{TV}}(P_{XY}^t, P_{XY}^j) < \sigma$ , then

$$\int \|\Phi(y) - \mathbf{h}^j(\mathbf{x})\|_{\ell^1} dP_{Y|X}^t(y|\mathbf{x}) dP_X^t(\mathbf{x}) < 2\sigma + \epsilon.$$

That is because

$$\begin{aligned} &\int \|\Phi(y) - \mathbf{h}^j(\mathbf{x})\|_{\ell^1} dP_{Y|X}^t(y|\mathbf{x}) dP_X^t(\mathbf{x}) \\ &\leq \int \left| \|\Phi(y_1) - \mathbf{h}^j(\mathbf{x})\|_{\ell^1} - \|\Phi(y_2) - \mathbf{h}^j(\mathbf{x})\|_{\ell^1} \right| dP_{Y|X}^t(y_1|\mathbf{x}) dP_{Y|X}^j(y_2|\mathbf{x}) dP_X^t(\mathbf{x}) \\ &\quad + \int \|\Phi(y_2) - \mathbf{h}^j(\mathbf{x})\|_{\ell^1} dP_{Y|X}^j(y_2|\mathbf{x}) d|P_X^t(\mathbf{x}) - P_X^j(\mathbf{x})| \\ &\quad + \int \|\Phi(y_2) - \mathbf{h}^j(\mathbf{x})\|_{\ell^1} dP_{Y|X}^j(y_2|\mathbf{x}) dP_X^j(\mathbf{x}) < 2\sigma + \epsilon. \end{aligned}$$

**Step 5.** According to the finite classes PAC theory, we know if  $d_{\text{TV}}(P_{XY}^t, P_{XY}^j) < \sigma$ , then with probability at least  $1 - \delta > 0$ ,

$$\frac{1}{m} \sum_{i=1}^m \|\mathbf{f}(\mathbf{x}^i) - \mathbf{h}^j(\mathbf{x}^i)\|_{\ell^1} < 2\sigma + \epsilon + 2\sqrt{\log(2n/\delta)/2m},$$

where  $\mathbf{f}$  is the true label function of  $P_{XY}^t$ .

**Step 6.** We still assume that  $d_{\text{TV}}(P_{XY}^t, P_{XY}^j) < \sigma$ . If at least  $(1 - \eta)m$  samples, such that  $\|\mathbf{h}^j(\mathbf{x}) - \mathbf{f}(\mathbf{x})\|_{\ell^1} > t_1 > 0$ , then

$$(1 - \eta)t_1 < 2\sigma + \epsilon + 2\sqrt{\frac{\log(2n/\delta)}{2m}}.$$

If we assume

$$(1 - \eta)t_1 \geq 2\sigma + \epsilon + 2\sqrt{\frac{\log(2n/\delta)}{2m}}.$$

Then, we know at least  $\eta m$  samples such that  $\|\mathbf{h}^j(\mathbf{x}) - \mathbf{f}(\mathbf{x})\|_{\ell^1} \leq t_1$ , which implies that there exists  $c \in [K]$  such that

$$h_c^j(\mathbf{x}) - \max_{k \in [K] - \{c\}} h_k^j(\mathbf{x}) \geq \tau,$$

if we set  $\tau = 1 - t_1$ .

Hence, assume that  $d_{\text{TV}}(P_{XY}^t, P_{XY}^j) < \sigma$ , if  $(1 - \eta)(1 - \tau) \geq 2\sigma + \epsilon + 2\sqrt{\frac{\log(2n/\delta)}{2m}}$ , with the probability at least  $1 - \delta$ , we have at least  $\eta m$  samples are the  $t$ -anchor points.

**Step 7.** With probability at least  $1 - (1 - \mathcal{P}(\mathcal{N}_{P_{XY}^t}^\sigma))^n$ , there exists  $j \in [n]$  such that  $d_{\text{TV}}(P_{XY}^t, P_{XY}^j) < \sigma$ .

**Step 8.** Combining **Steps 6** and **7**, we complete the proof.

### A.6 Proof for Theorem 3

We denote the distribution generated by all  $\tau$ -anchor points as  $P_X^\tau = P_{X|X \in A_\tau}^t$ , where the set  $A_\tau$  consists of all  $\tau$ -anchor points over space  $\mathcal{X}$ .

**Step 1.** If assume that  $m = +\infty$ , then according to Theorem 2, we have: with the probability at least  $1 - (1 - \mathcal{P}(\mathcal{N}_{P_{XY}^t}^\sigma))^n$ , if  $(1 - \eta')(1 - \tau) \geq 2\sigma + \epsilon$ , then

$$P(A_\tau) \geq \eta',$$

which implies that if we set  $(1 - \eta')(1 - \tau) = 2\sigma + \epsilon$ , then with the probability at least  $1 - (1 - \mathcal{P}(\mathcal{N}_{P_{XY}^t}^\sigma))^n$ ,

$$P(A_\tau) \geq 1 - \frac{2\sigma + \epsilon}{1 - \tau}.$$

**Step 2.** We consider

$$d_{\text{TV}}(P_X^t, P_X^\tau)$$

Note that

$$d_{\text{TV}}(P_X^t, P_X^\tau) = \sup_A |P_X^t(A) - P_X^\tau(A)|,$$

where  $A$  is any measurable set.

Then, with the probability at least  $1 - (1 - \mathcal{P}(\mathcal{N}_{P_{XY}^t}^\sigma))^n$ , we have

$$\begin{aligned} d_{\text{TV}}(P_X^t, P_X^\tau) &= \sup_A |P_X^t(A) - P_X^\tau(A)| \\ &= \sup_A |P_X^t(A) - P_X^t(A \cap A_\tau)/P_X^t(A_\tau)| \\ &\leq P_X^t(A_\tau^c)/P_X^t(A_\tau) \leq \frac{2\sigma + \epsilon}{1 - \tau - 2\sigma - \epsilon}. \end{aligned}$$

**Step 3.** It is easy to check that

$$|\mathcal{L}_t(\mathbf{h}) - \int \ell(\mathbf{h}(\mathbf{x}), \Phi(y)) dP_{Y|X}^t(y|\mathbf{x}) dP_X^\tau(\mathbf{x})| \leq M d_{\text{TV}}(P_X^t, P_X^\tau).$$

**Step 4.** Note that  $\mathcal{H}$  has finite Natarajan dimension (we set the dimension is  $d$ ). By Natarajan dimension theory, we know that with the probability at least  $1 - \delta$ :

$$|\widehat{\mathcal{L}}_s^\tau(\mathbf{h}) - \int \ell(\mathbf{h}(\mathbf{x}), \Phi(y)) dP_{Y|X}^t(y|\mathbf{x}) dP_X^\tau(\mathbf{x})| \leq 2M \sqrt{\frac{8d \log \tilde{m} + 16d \log(K+1) + 2 \log(2/\delta)}{\tilde{m}}},$$

where  $\tilde{m} = |A_\tau \cap T|$ .

**Step 5.** Combining **Steps 3** and **4**, we have that with the probability at least  $1 - \delta$ :

$$|\widehat{\mathcal{L}}_s^\tau(\mathbf{h}) - \mathcal{L}_t(\mathbf{h})| \leq 2M \sqrt{\frac{8d \log \tilde{m} + 16d \log(K+1) + 2 \log(2/\delta)}{\tilde{m}}} + M d_{\text{TV}}(P_X^t, P_X^\tau).$$

**Step 6.** Combining **Steps 5** and **2**, we have that with the probability at least  $1 - \delta - (1 - \mathcal{P}(\mathcal{N}_{P_{XY}^t}^\sigma))^n$ :

$$|\widehat{\mathcal{L}}_s^\tau(\mathbf{h}) - \mathcal{L}_t(\mathbf{h})| \leq 2M \sqrt{\frac{8d \log \tilde{m} + 16d \log(K+1) + 2 \log(2/\delta)}{\tilde{m}}} + M \frac{2\sigma + \epsilon}{1 - \tau - 2\sigma - \epsilon}.$$

**Step 7.** According to the results of **Step 6** and Theorem 2, we know that for any  $b \in (0, 1)$ , there exist a constant  $C(b, K)$  such that with the probability at least  $1 - 2\delta - 2(1 - \mathcal{P}(\mathcal{N}_{P_{XY}^t}^\sigma))^n$ :

$$|\widehat{\mathcal{L}}_s^\tau(\mathbf{h}) - \mathcal{L}_t(\mathbf{h})| \leq MC(b, K) \sqrt{\frac{\log(2/\delta)}{\eta^{1-b} m^{1-b}}} + M \frac{2\sigma + \epsilon}{1 - \tau - 2\sigma - \epsilon}.$$

## Checklist

1. For all authors...
  - (a) Do the main claims made in the abstract and introduction accurately reflect the paper's contributions and scope? [Yes]
  - (b) Did you describe the limitations of your work? [Yes] See the limitations in Section 4. To make sure our problem is solvable from the mathematical perspective, some mild assumptions are necessary. Though we have some assumptions for our theory, those assumptions are commonly used in other important fields, such as meta learning, domain generalization and noisy learning. In addition, as we have mentioned, our assumptions are much weaker than previous existing works.
  - (c) Did you discuss any potential negative societal impacts of your work? [N/A] One of the aims of our problem is to address the privacy preservation issues. Our work is positive for society. We do not think our work has negative societal impacts.
  - (d) Have you read the ethics review guidelines and ensured that your paper conforms to them? [Yes]
2. If you are including theoretical results...
  - (a) Did you state the full set of assumptions of all theoretical results? [Yes] See Section 4.
  - (b) Did you include complete proofs of all theoretical results? [Yes] See the supplementary material.
3. If you ran experiments...
  - (a) Did you include the code, data, and instructions needed to reproduce the main experimental results (either in the supplemental material or as a URL)? [Yes] We have introduced detailed instructions to reproduce the main experimental results in our paper and supplemental material, and will release the code after this paper has been accepted.
  - (b) Did you specify all the training details (e.g., data splits, hyperparameters, how they were chosen)? [Yes] See Section 5 and the supplementary material A.1.
  - (c) Did you report error bars (e.g., with respect to the random seed after running experiments multiple times)? [Yes] See the supplementary material A.1.
  - (d) Did you include the total amount of compute and the type of resources used (e.g., type of GPUs, internal cluster, or cloud provider)? [Yes] See the supplementary material.
4. If you are using existing assets (e.g., code, data, models) or curating/releasing new assets...
  - (a) If your work uses existing assets, did you cite the creators? [Yes] See Section 6.
  - (b) Did you mention the license of the assets? [Yes] See Section 6.
  - (c) Did you include any new assets either in supplemental material or as a URL? [Yes]
  - (d) Did you discuss whether and how consent was obtained from people whose data you're using/curating? [Yes] See Section 6.
  - (e) Did you discuss whether the data you are using/curating contains personally identifiable information or offensive content? [Yes] See Section 6.
5. If you used crowdsourcing or conducted research with human subjects...
  - (a) Did you include the full text of instructions given to participants and screenshots, if applicable? [N/A]
  - (b) Did you describe any potential participant risks, with links to Institutional Review Board (IRB) approvals, if applicable? [N/A]
  - (c) Did you include the estimated hourly wage paid to participants and the total amount spent on participant compensation? [N/A]
